# Supplementary material for: Balloon atrial septostomy in d-Transposition of the Great Arteries-predictive discriminators for intervention
Source: Research Square preprint supplement (doi:10.21203/rs.3.rs-6494276/v1), 2025-05-09

Supplementary material for: Balloon atrial septostomy in d-Transposition of the Great Arteries - predictive discriminators for intervention

**Authors**: 1Sinead Burke (first), 1Siobhan Coughlan, 2Martina Healy, 3,6Jennifer J Brady, 1Kevin Walsh, 1Damien Kenny, 1Paul Oslizlok, 4Jonathan McGuinness, 5Afif El Khuffash, 1Terence Prendiville (last and corresponding)

**Institution**: 1Department of paediatric cardiology, Children’s Health Ireland at Crumlin, Dublin, Ireland; 2Department of intensive care, Children’s Health Ireland at Crumlin, Dublin, Ireland; 3Biochemistry Department, Children’s Health Ireland at Crumlin, Dublin, Ireland; 4Department of cardiothoracic surgery, Children’s Health Ireland at Crumlin, Dublin, Ireland; 5Department of neonatology. Rotunda Hospital, Parnell Sq. E. Dublin, 6 School of Medicine, University College Dublin.

**Corresponding author:** Dr. Terence Prendiville; [terence.prendiville@cuh.ie](mailto:terence.prendiville@cuh.ie)

**Supplementary material**.

**
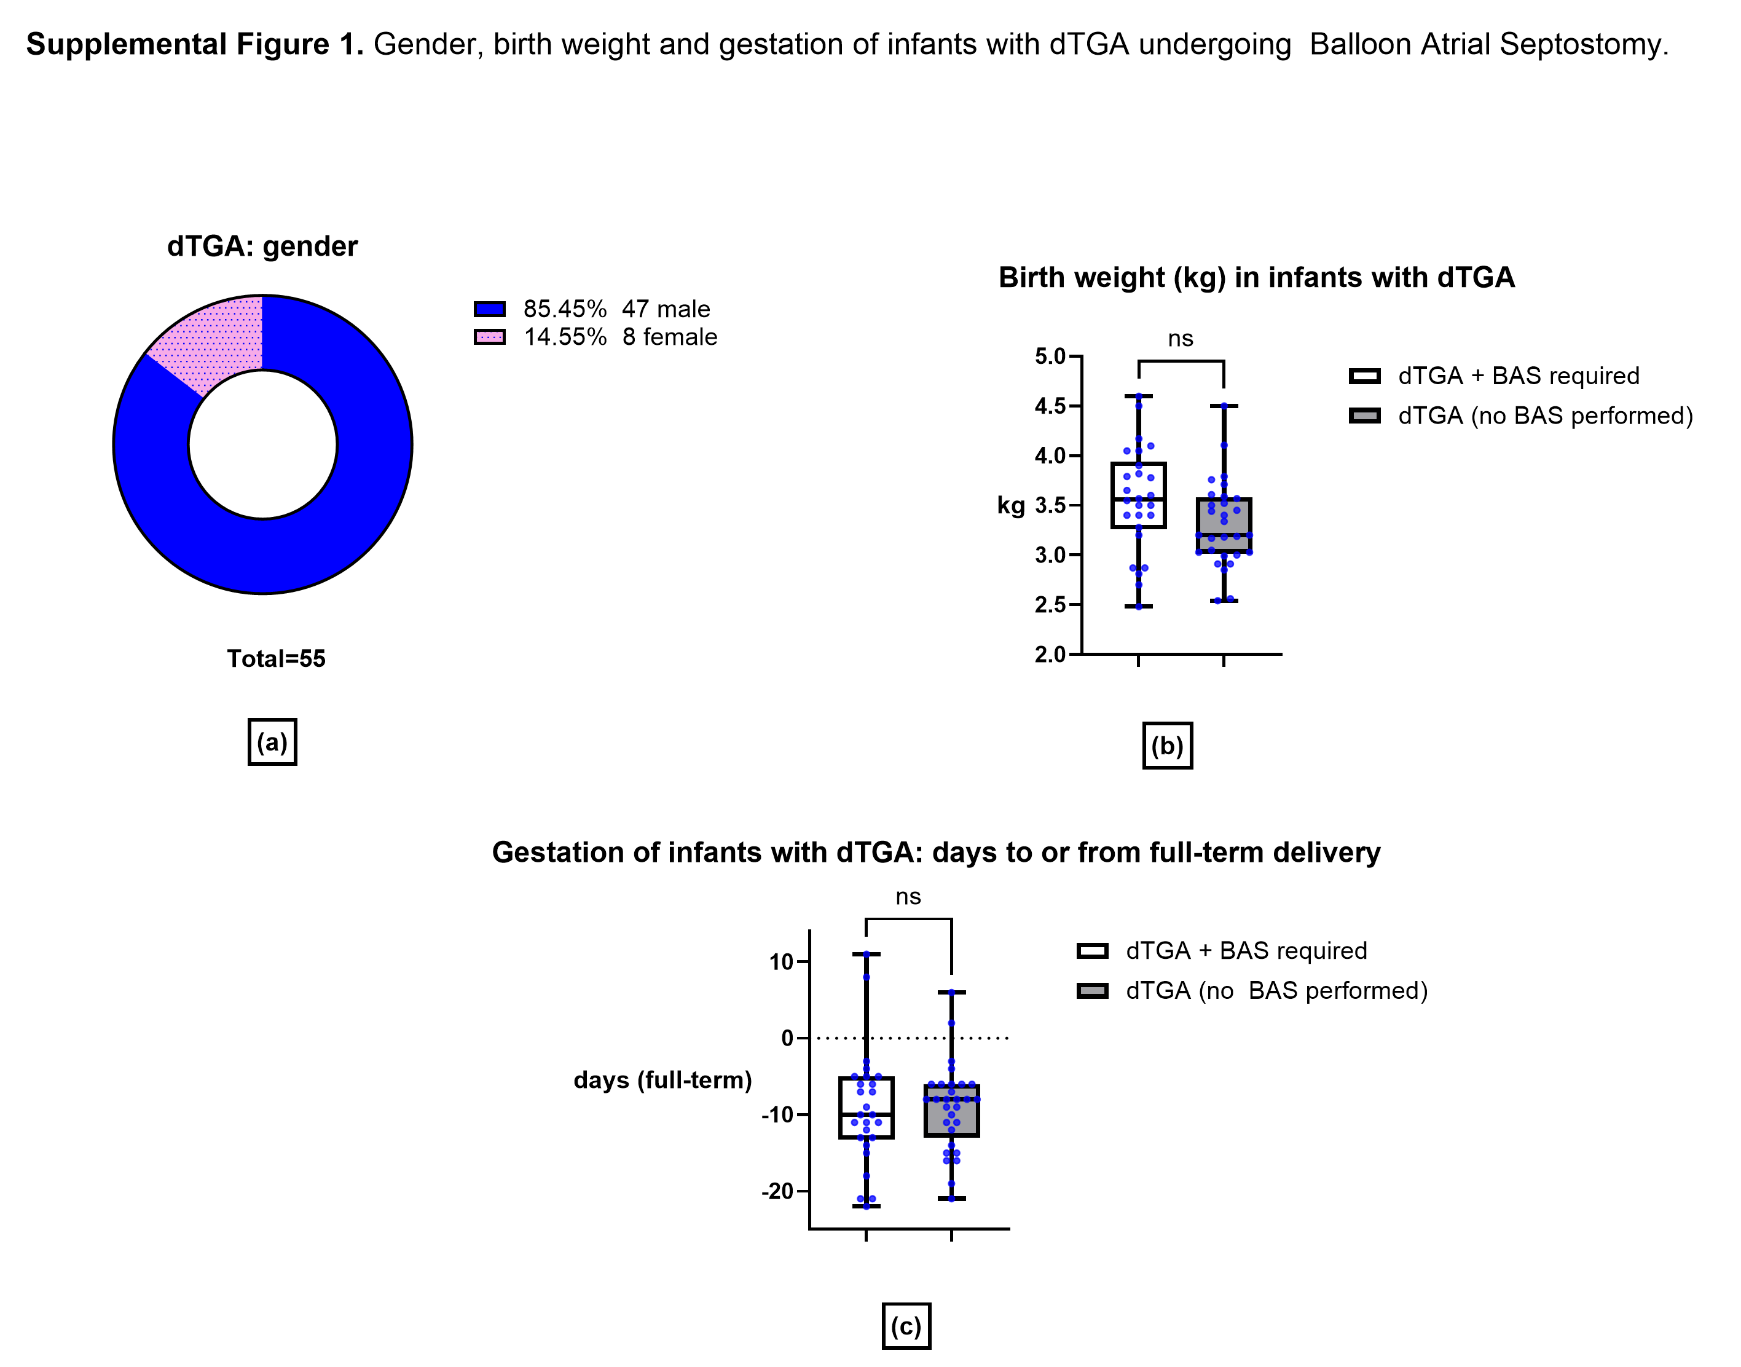
Supplemental Figure S1**. Gender, birth weight and gestation of infants with d-Transposition of the Great Arteries (dTGA) undergoing Balloon A trial Septostomy (BAS).

**Supplemental Figure S2.** A comparison of peri-operative course in neonates with d-Transposition of the Great Arteries between those undergoing a Balloon Atrial Septostomy or not.


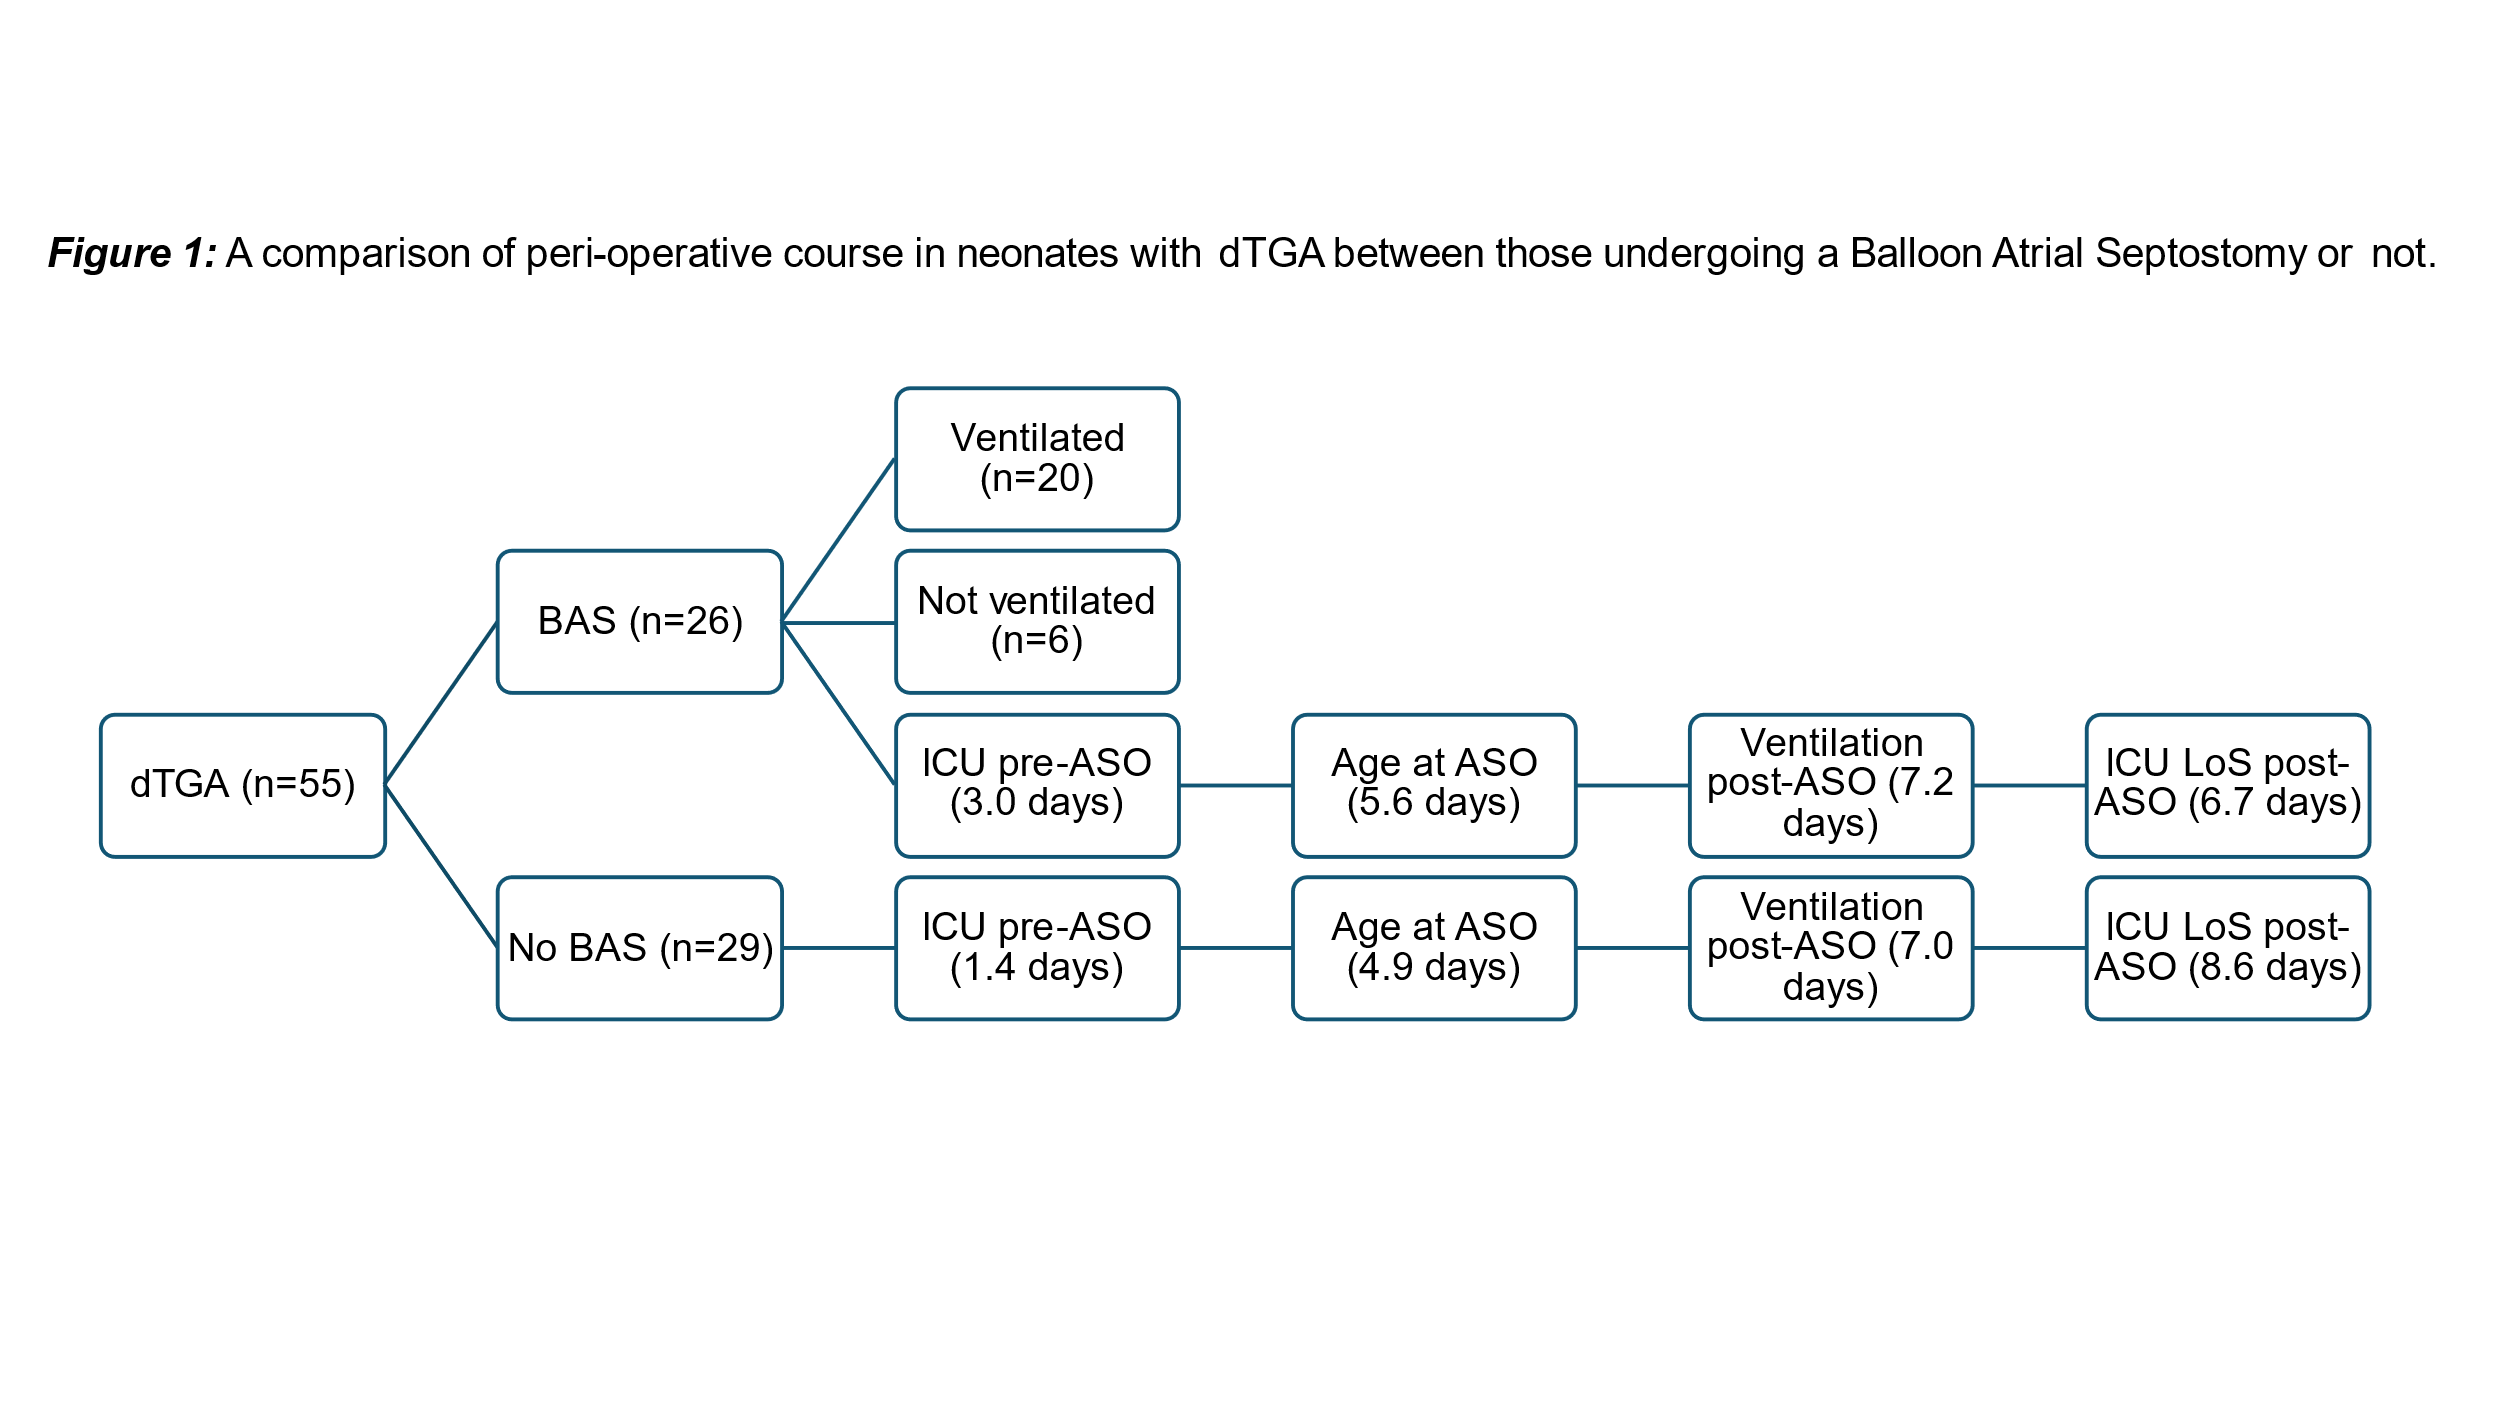


**Supplemental Figure S3**. Atrial septal defect size by echocardiography in infants with d-Transposition of the Great Arteries (dTGA) pre- and post-Balloon Atrial Septostomy (BAS).


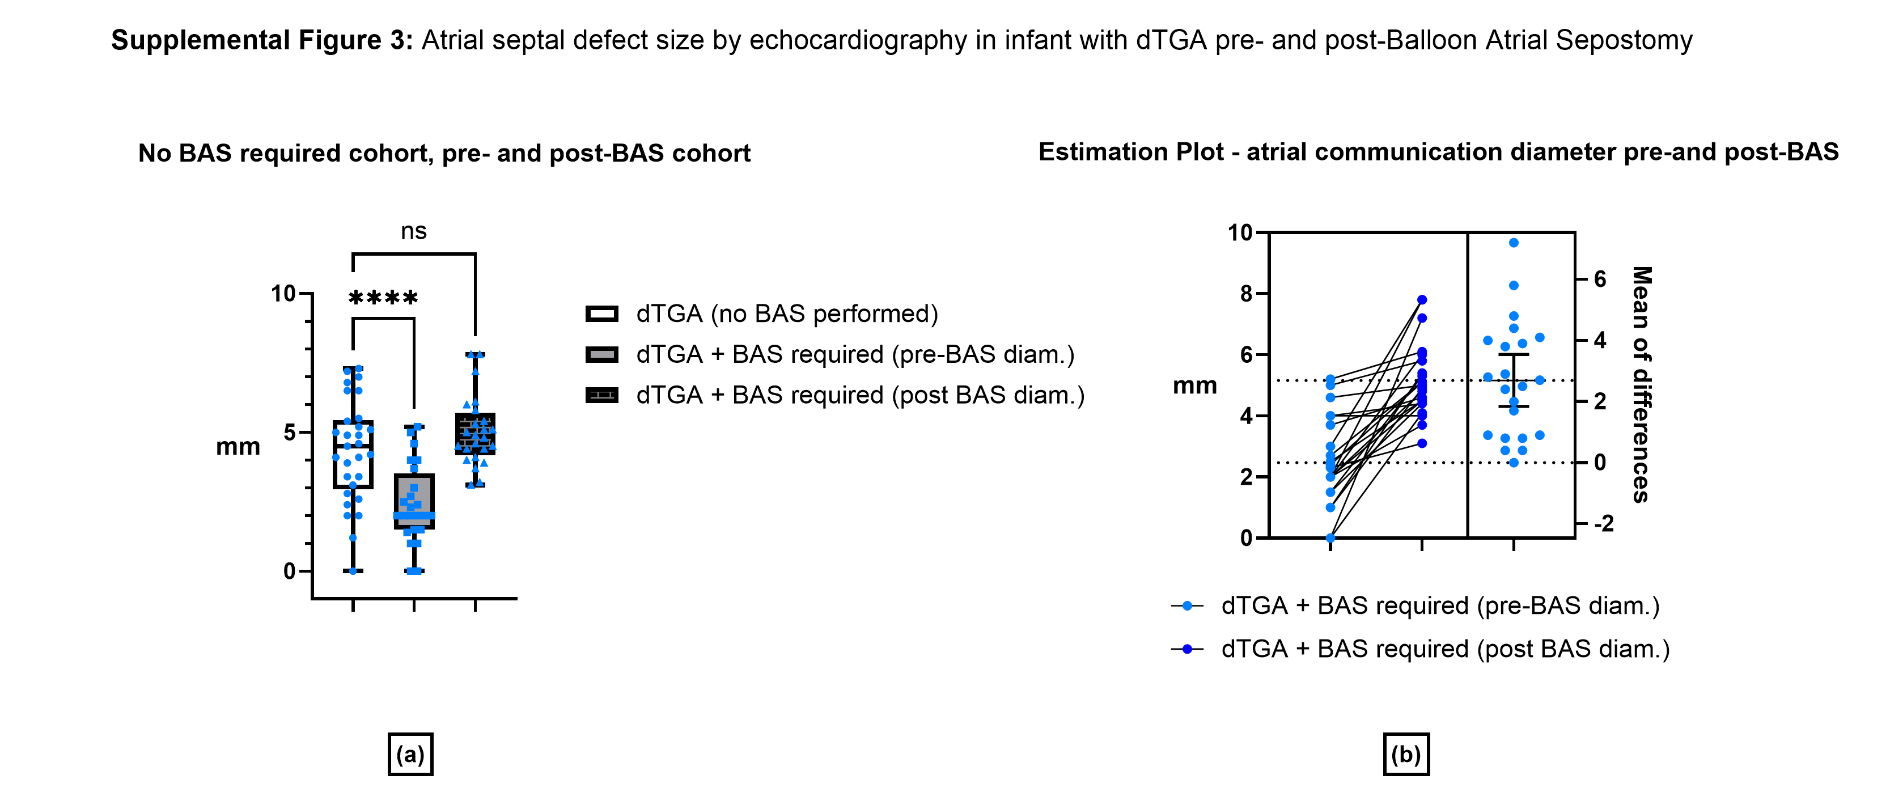


**Supplemental Figure S4**. Intensive Care Unit (ICU) course in neonates with d-Transposition of the Great Arteries (dTGA) - Comparing those requiring Balloon Atrial Septostomy (BAS) versus to those that did not prior to the Arterial Switch Operation (ASO).


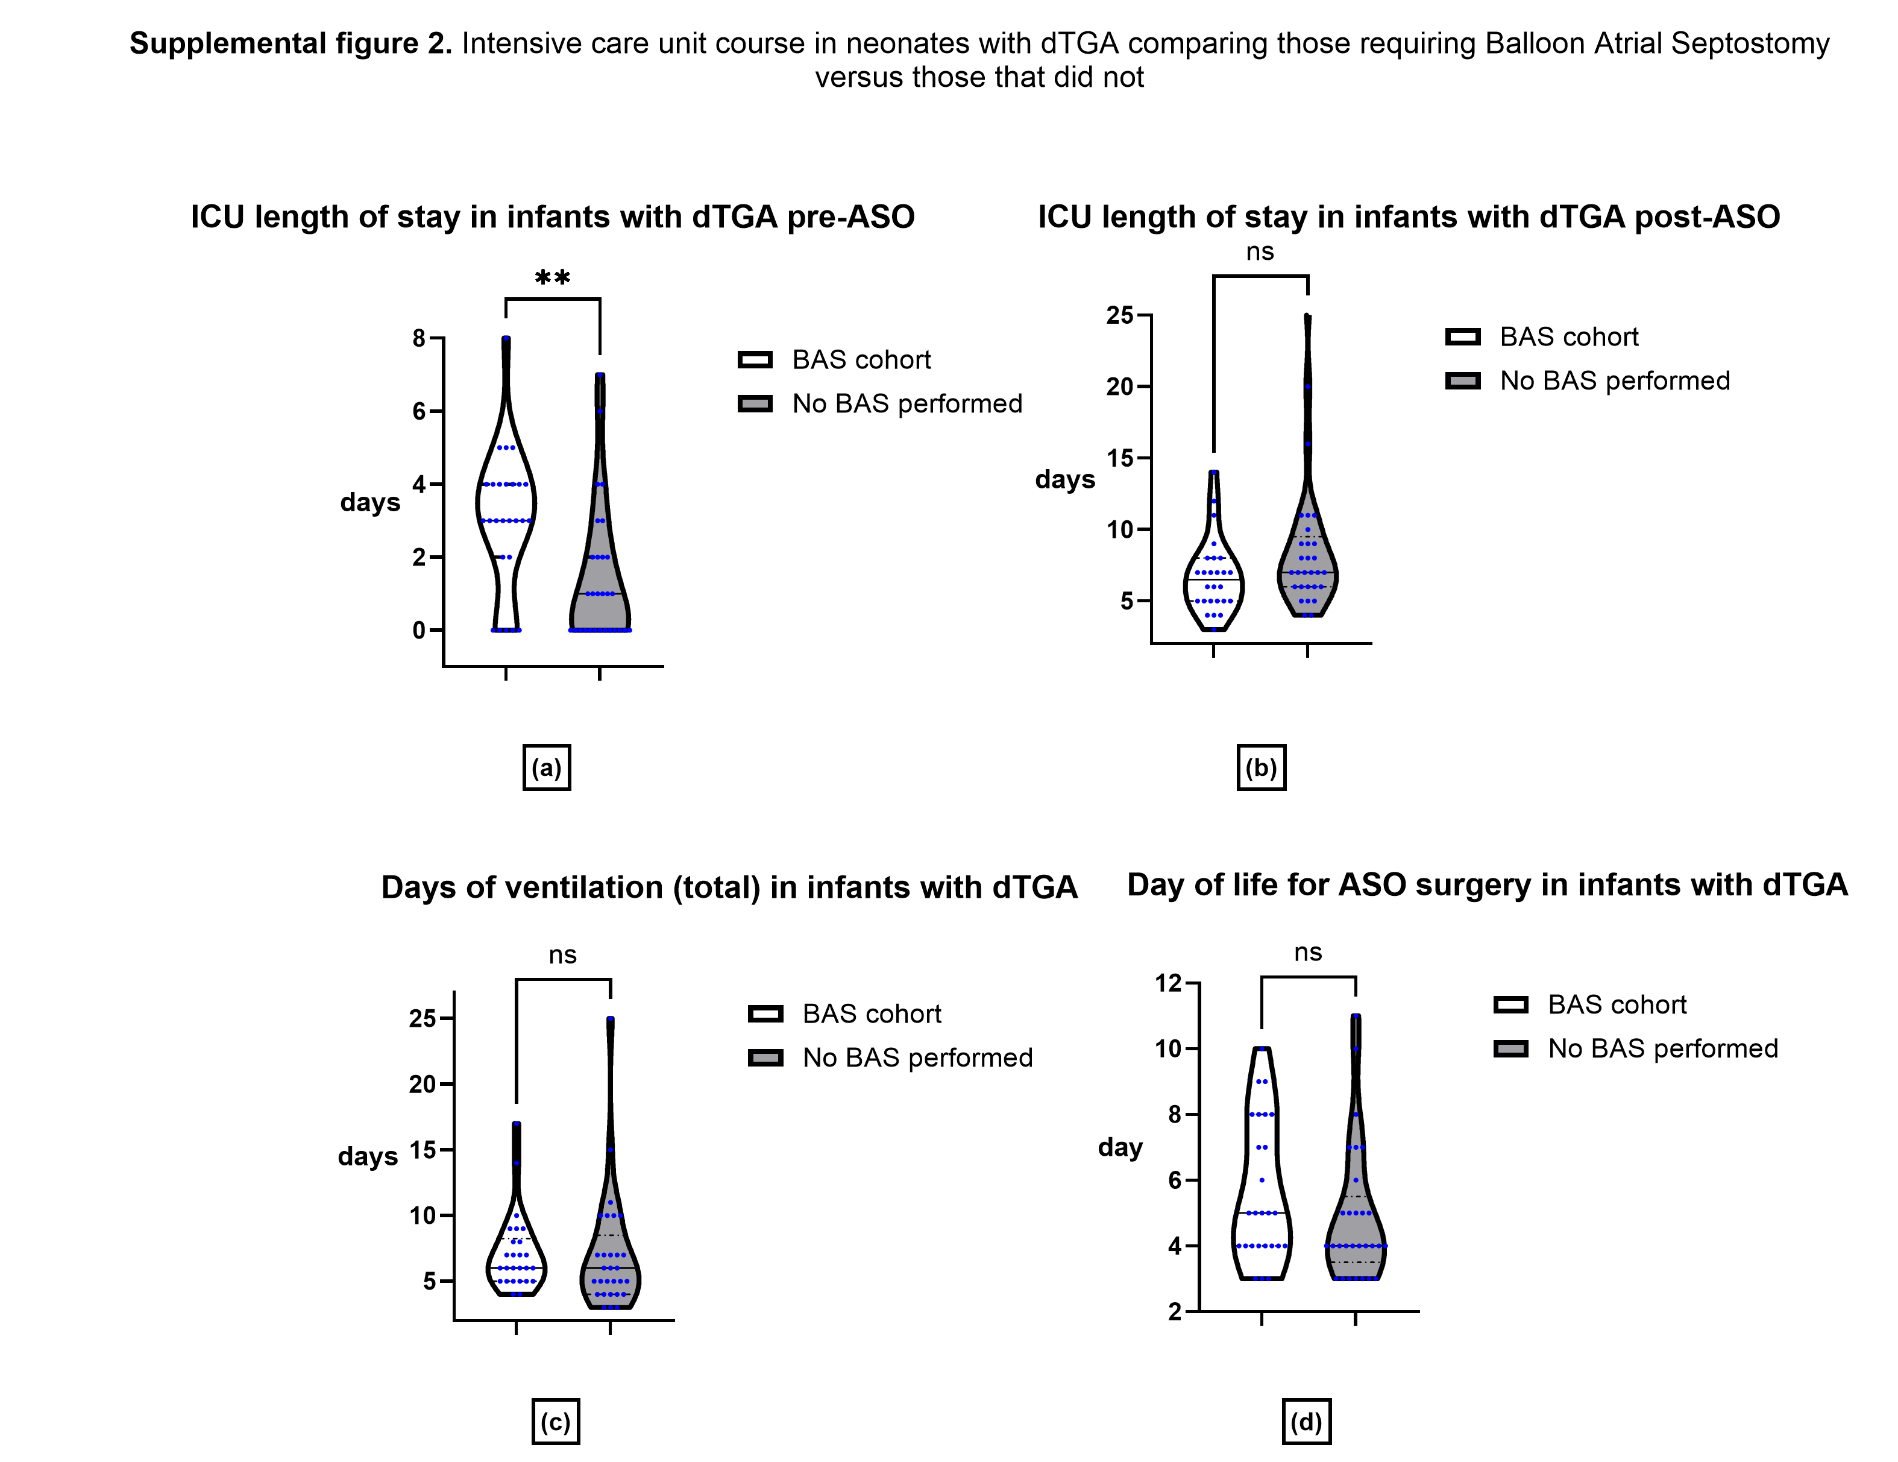

Supplement: Supplementary file 1 [file fc43243220910bece08a9035.docx]
